# Supplementary material for: A three-dimensional graphitic carbon nitride belt network for enhanced visible light photocatalytic hydrogen evolution
Source: Royal Society of Chemistry journal article supplement (doi:10.1039/c6ta07397b), 2016-01-01
Supplement: c6ta07397b1.pdf [file c6ta07397b1.pdf]

## Electronic Supplementary Materials

### Three-dimensional graphitic carbon nitride belt network for enhanced visible light photocatalytic hydrogen evolution

Yunxiong Zeng<sup>a</sup>, Chengbin Liu<sup>a,\*</sup>, Longlu Wang<sup>a</sup>, Shuqu Zhang<sup>a</sup>, Yangbin Ding<sup>a</sup>,

Yuzi Xu<sup>a</sup>, Yutang Liu<sup>b</sup>, Shenglian Luo<sup>a,\*</sup>

**Table S1** Atomic percentage obtained from XPS spectra of bulk g-C<sub>3</sub>N<sub>4</sub> and g-C<sub>3</sub>N<sub>4</sub> NB.

| Samples                              | C (%) | N (%) | O (%) | C/N  |
|--------------------------------------|-------|-------|-------|------|
| bulk g-C <sub>3</sub> N <sub>4</sub> | 41.59 | 56.99 | 1.42  | 0.73 |
| bulk g-C <sub>3</sub> N <sub>4</sub> | 42.32 | 53.08 | 4.60  | 0.80 |

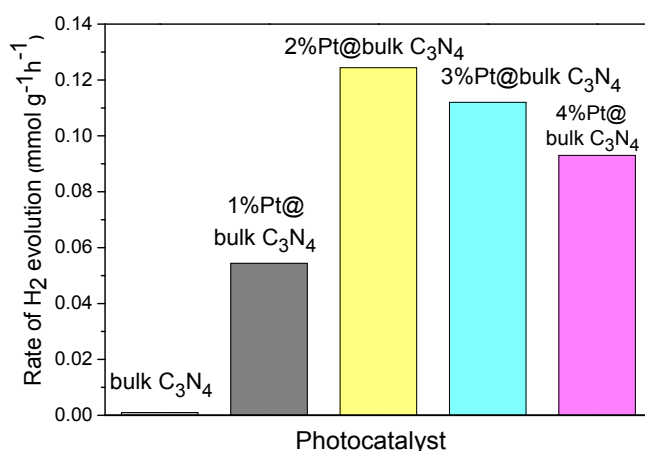

**Fig. S1** HER of bulk g-C<sub>3</sub>N<sub>4</sub> loaded with various content Pt under visible light ( $\lambda > 420$  nm) using 10% TEOA as sacrificial agent.

#### Determination of apparent quantum efficiency

The apparent quantum efficiency (AQE) for 3wt% Pt@g-C<sub>3</sub>N<sub>4</sub> NB was measured under the same photocatalytic reaction condition and the incident light was supplied by a 300W Xe lamp with specific band-pass filters to get the desired incident wavelength (420 nm). The catalyst solution was irradiated for 10 hours. The average intensity of irradiation was determined to be 3.58 mW·cm<sup>-2</sup> and the irradiation area was 5.96 cm<sup>2</sup>. The amount of H<sub>2</sub> molecules generated in 10 hours was 158.1  $\mu$ mol. The quantum efficiency was calculated by Equation 1. The number of evolved H<sub>2</sub> molecules was

calculated by Equation 2. The number of incident photons was  $1.606 \times 10^{21}$  as calculated by Equation 3.

$$\begin{aligned} \text{AQE}[\%] &= \frac{\text{Number of reacted electrons}}{\text{Number of incident photons}} \times 100 \\ &= \frac{\text{Number of H}_2 \text{ molecules} \times 2}{\text{Number of incident photos}} \times 100 \quad (1) \end{aligned}$$

$$\text{Number of H}_2 \text{ molecules} = 6.02 \times 10^{23} \times 158.1 \times 10^{-6} = 7.89 \times 10^{19} \quad (2)$$

$$\begin{aligned} \text{Number of incident photons} &= E\lambda/hc = (3.58 \times 10^{-3} \times 5.96 \times 3600 \times 10 \times 420 \times 10^{-9}) / \\ &(6.626 \times 10^{-34} \times 3 \times 10^8) = 1.62 \times 10^{21} \quad (3) \end{aligned}$$

The calculated AQE at 420 nm is 12%.

**Table S2.** Comparison g-C<sub>3</sub>N<sub>4</sub> based composites for visible-light-driven photocatalytic HER using sacrificial agent as electron donor.

| Photocatalysts                                                      | Light source<br>Xe lamp (nm) | Sacrificial<br>agent (vol %) | Activity<br>(mmol/g/h) | AQE (%)        |
|---------------------------------------------------------------------|------------------------------|------------------------------|------------------------|----------------|
| Pt/g-C <sub>3</sub> N <sub>4</sub> <sup>S1</sup>                    | 300W $\lambda \geq 420$      | 10 % TEOA                    | 0.375                  | -              |
| Pt/g-C <sub>3</sub> N <sub>4</sub> <sup>S2</sup>                    | 300W $\lambda \geq 420$      | 10 % TEOA                    | 1.150                  | -              |
| Pt/g-C <sub>3</sub> N <sub>4</sub> <sup>S3</sup>                    | 300W $\lambda \geq 400$      | 10 % TEOA                    | 0.640                  | -              |
| Pt/g-C <sub>3</sub> N <sub>4</sub> <sup>S4</sup>                    | 300W $\lambda \geq 420$      | 10 % TEOA                    | 0.230                  | -              |
| Pt/g-C <sub>3</sub> N <sub>4</sub> <sup>S5</sup>                    | 125W $\lambda \geq 400$      | 10 % TEOA                    | 0.240                  | -              |
| Pt/g-C <sub>3</sub> N <sub>4</sub> <sup>S6</sup>                    | 300W $\lambda \geq 420$      | 10 % TEOA                    | 0.098                  | 0.58% (440 nm) |
| NiS/g-C <sub>3</sub> N <sub>4</sub> <sup>S7</sup>                   | 300W $\lambda \geq 420$      | 15 % TEOA                    | 0.482                  | 4.4% (440nm)   |
| Pt/BiPO <sub>4</sub> /g-C <sub>3</sub> N <sub>4</sub> <sup>S8</sup> | 300W $\lambda \geq 420$      | 10%methanol                  | 1.110                  | -              |
| Pt/g-PAN/g-C <sub>3</sub> N <sub>4</sub> <sup>S9</sup>              | 300W $\lambda \geq 400$      | 10 % TEOA                    | 0.370                  | -              |
| Ag <sub>2</sub> O/g-C <sub>3</sub> N <sub>4</sub> <sup>S10</sup>    | 300W $\lambda \geq 420$      | 10 % TEOA                    | 0.330                  | -              |
| Pt/g-C <sub>3</sub> N <sub>4</sub> <sup>S11</sup>                   | 300W $\lambda \geq 400$      | 10 % TEOA                    | 0.604                  | -              |
| Pt/g-C <sub>3</sub> N <sub>4</sub> <sup>S12</sup>                   | 300W $\lambda \geq 400$      | 11 % TEOA                    | 1.510                  | 5.7%           |
| Pt/g-C <sub>3</sub> N <sub>4</sub><br>(our work)                    | 300W $\lambda \geq 420$      | 10 % TEOA                    | 1.360                  | 12%            |

### H<sub>2</sub>O<sub>2</sub> determination principle by the I<sub>3</sub><sup>-</sup> method

H<sub>2</sub>O<sub>2</sub> determination was realized according to I<sub>3</sub><sup>-</sup> strategy.<sup>S13</sup> In detail, standard K<sub>2</sub>MnO<sub>4</sub> solution (0.02M) was used to precisely titrate concentration of H<sub>2</sub>O<sub>2</sub> according to equation (1):

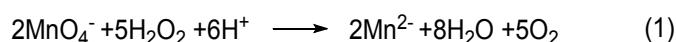

Then prepare a suite of gradient concentration standard H<sub>2</sub>O<sub>2</sub> solution. After added I<sup>-</sup> anion completely reduces H<sub>2</sub>O<sub>2</sub> molecule into H<sub>2</sub>O in equation (2), and oxidation product I<sub>3</sub><sup>-</sup> anion was quantitatively measured by UV-Vis spectra.

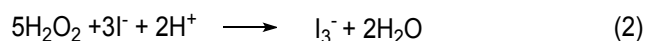

In the end, calculated the oxidation product  $\text{H}_2\text{O}_2$  content derived from photocatalytic overall water splitting after centrifugation to remove photocatalyst.

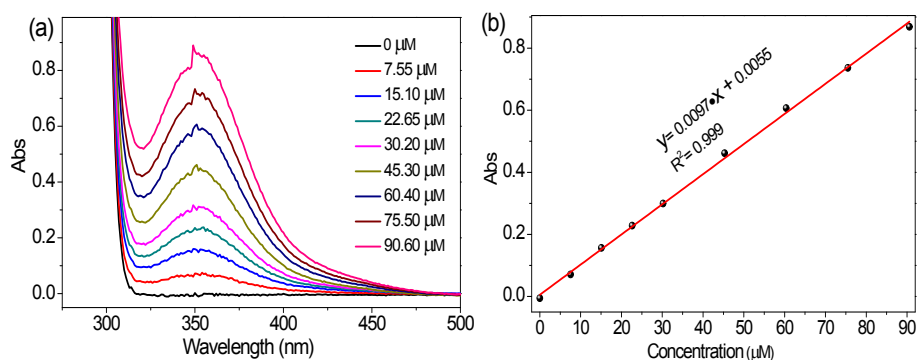

**Fig. S2** (a) UV-Vis spectra of  $\text{I}_3^-$  by  $\text{H}_2\text{O}_2$  oxidation and (b) linear fitting curve.

Accurate analysis of aqueous trace  $\text{H}_2\text{O}_2$  concentration as low as  $\mu\text{M}$  can be done by  $\text{I}_3^-$  method, based on the spectrophotometric determination of  $\text{I}_3^-$  formed when  $\text{H}_2\text{O}_2$  added to a mixed concentrated solution of  $\text{I}^-$  and potassium acid phthalate. In the UV-Vis spectrum in Fig. S2a, maximum absorption peak at ca. 351 nm was unique characteristic peak of  $\text{I}_3^-$ , thus in accordance with a series of gradient concentration  $\text{I}_3^-$  solution acquires Abs function  $\text{I}_3^-$  concentration in Fig. S2b.

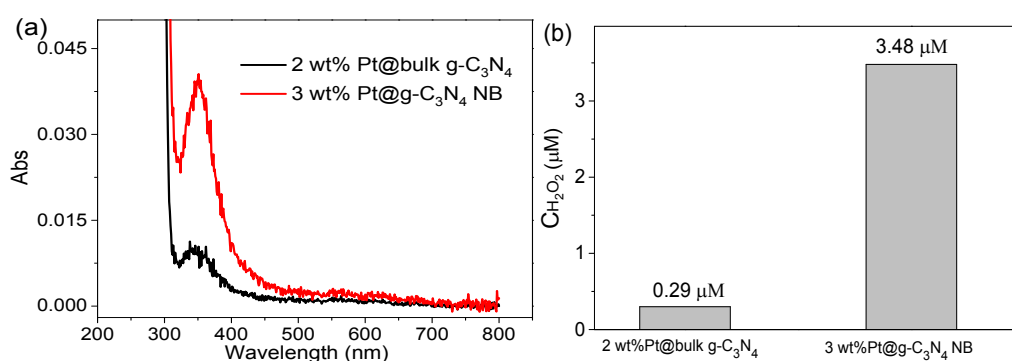

**Fig. S3** (a) UV-Vis spectra of  $\text{I}_3^-$  by  $\text{H}_2\text{O}_2$  oxidation from photocatalytic overall water splitting of 3 wt%Pt@g- $\text{C}_3\text{N}_4$  NB under visible light illumination ( $\lambda > 420$  nm) and (b) corresponding  $\text{H}_2\text{O}_2$  concentration. (Conditions: 20 mg photocatalyst, reaction hour: 1 hour)

## Reference

- S1. J. Li, B. Shen, Z. Hong, B. Lin, B. Gao and Y. Chen, *Chem. Commun.*, 2012, **48**, 12017-12019.
- S2. X. Lu, K. Xu, P. Chen, K. Jia, S. Liu and C. Wu, *J. Mater. Chem. A*, 2014, **2**, 18924-18928.
- S3. P. Niu, L. Zhang, G. Liu and H.-M. Cheng, *Adv. Funct. Mater.*, 2012, **22**, 4763-4770.
- S4. J. Xu, L. Zhang, R. Shi and Y. Zhu, *J. Mater. Chem. A*, 2013, **1**, 14766-14772.
- S5. S. Martha, A. Nashim and K. M. Parida, *J. Mater. Chem. A*, 2013, **1**, 7816-7824.
- S6. Y. Shiraishi, Y. Kofuji, S. Kanazawa, H. Sakamoto, S. Ichikawa, S. Tanaka, and T. Hirai, *Chem.*

- Commun.*, 2014, **50**, 15255-15258.
- S7. J. Hong, Y. Wang, Y. Wang, W. Zhang and R. Xu, *ChemSusChem*, 2013, **6**, 2263-2268.
- S8. J. Yuan, Q. Gao, X. Li, Y. Liu, Y. Fang, S. Yang, F. Peng and X. Zhou, *RSC Adv.*, 2014, **4**, 52332-52337.
- S9. F. He, G. Chen, Y. Yu, S. Hao, Y. Zhou and Y. Zheng, *ACS appl. Mater. interfaces*, 2014, **6**, 7171-7179.
- S10. M. Wu, J. M. Yan, X. W. Zhang, M. Zhao, and Q. Jiang, *J. Mater. Chem. A*, 2015, **3**, 15710-15714.
- S11. Y. Li, Z. Wang, T. Xia, H. Ju, K. Zhang, R. Long, Q. Xu, C. Wang, L. Song, J. Zhu, J. Jiang and Y. Xiong, *Adv.mater.*, 2016, **28**, 6959-6965.
- S12. Y. Li, H. Xu, S. Ouyang, D. Lu, X. Wang, D. Wang, and J. Ye, *J. Mater. Chem. A*, 2016, **4**, 2943-2950.
- S13. N. V. Kiassen, D. Marchington, and H. C. E. McGowan, *Anal. Chem.*, 1994,**66**, 2921-2925.
